# Supplementary material
Source: ML conference proceedings conference paper supplement (https://proceedings.mlr.press/v108/ao20a.html)
Supplement: Supplementary file [file ao20a-supp.pdf]

---

## SUPPLEMENTARY MATERIAL

---

### 1 Proof of Theorem 3.1

**Theorem 3.1.** *Suppose that  $\theta$  is a random variable defined on state space  $\Theta$ , with probability density  $p(\theta)$ . For any given  $\theta \in \Theta$ , let  $y$  and  $y'$  be two random variables that are independent conditional on  $\theta$ , and both follow the same distribution  $p(y|\theta)$ . Now define  $z = y - y'$ , and we then have,*

$$E_{\theta}[H(p(y|\theta))] \leq H(E_{\theta}[p(z|\theta)]) - \frac{\dim(y)}{2} \log 2,$$

where  $\dim(y)$  is the dimensionality of  $y$ .

*Proof.* From Shannon's entropy power inequality [1], we obtain,

$$\begin{aligned} & \exp(2H(p(z|\theta))/\dim(y)) \\ \geq & \exp(2H(p(y|\theta))/\dim(y)) + \exp(2H(p(-y|\theta))/\dim(y)) \\ = & 2 \exp(2H(p(y|\theta))/\dim(y)), \end{aligned}$$

which implies that

$$H(p(y|\theta)) \leq H(p(z|\theta)) - \frac{\dim(y)}{2} \log 2. \quad (1)$$

Taking expectation with respect to  $p(\theta)$  on both sides of Eq. (1) yields,

$$\begin{aligned} & E_{\theta}[H(p(y|\theta))] \\ \leq & E_{\theta}[H(p(z|\theta))] - \frac{\dim(y)}{2} \log 2 \\ \leq & H(E_{\theta}[p(z|\theta)]) - \frac{\dim(y)}{2} \log 2, \end{aligned} \quad (2)$$

where the last inequality is due to the concavity of the entropy [1].  $\square$

### 2 Proof of Corollary 3.2

**Corollary 3.2.** *Suppose  $p(\theta)$ ,  $p(y|\theta)$ , and  $p(z|\theta)$  are defined as is in Theorem 3.1, and  $p(\theta)$  admits the form of,*

$$p(\theta) = \sum_{l=1}^L \omega_l f_l(\theta),$$

where  $\omega_l \geq 0$  for  $l = 1 \dots L$ ,  $\sum_{l=1}^L \omega_l = 1$ , and  $f_l(\theta)$  are density functions. Then

$$\begin{aligned} E_{\theta}[H(p(y|\theta))] & \leq \sum_{l=1}^L \omega_l H(E_{\theta \sim f_l}[p(z|\theta)]) - \frac{\dim(y)}{2} \log 2 \\ & \leq H(E_{\theta}[p(z|\theta)]) - \frac{\dim(y)}{2} \log 2. \end{aligned}$$

*Proof.* Recall that the prior takes the form of

$$p(\theta) = \sum_{l=1}^L \omega_l f_l(\theta),$$

and we have

$$\begin{aligned} E_{\theta}[H(p(y|\theta))] & = \int_{\Theta} p(\theta) H(p(y|\theta)) d\theta \\ & = \sum_{l=1}^L \omega_l \int_{\Theta} f_l(\theta) H(p(y|\theta)) d\theta \\ & \leq \sum_{l=1}^L \omega_l H(E_{\theta \sim f_l}[p(z|\theta)]) - \frac{\dim(y)}{2} \log 2, \end{aligned} \quad (3)$$

where the inequality above is a direct consequence of Theorem 3.1. Once again, because the entropy is concave, we have

$$\begin{aligned} & \sum_{l=1}^L \omega_l H(E_{\theta \sim f_l}[p(z|\theta)]) - \frac{\dim(y)}{2} \log 2 \\ \leq & H\left(\sum_{l=1}^L \omega_l E_{\theta \sim f_l}[p(z|\theta)]\right) - \frac{\dim(y)}{2} \log 2 \\ = & H(E_{\theta}[p(z|\theta)]) - \frac{\dim(y)}{2} \log 2. \end{aligned} \quad (4)$$

$\square$

### 3 Implementation details

This section provides the experimental setup and implementation details of the examples. Code for reproducing our experiments can be found at [https://github.com/ziq-ao/LBKLD\\_estimator](https://github.com/ziq-ao/LBKLD_estimator).

**The mathematical example.** We estimate the expected LB-KLD utility function values with  $3 \times 10^4$  (i.e.  $n = 10^4$ ) model simulations. In the prior partition step, we set  $n_{min} = 10$  and  $L = 5$ . Averaging

was done over 100 independent runs to mitigate the random errors. Moreover we generate a larger number ( $10^5$ ) of samples to estimate the KLD based expected utility function values with the nested MC method. For the D-posterior precision method, 100 samples are kept from  $10^4$  prior-predictive simulations to form the ABC posterior. Again, the reported results are the average over 100 runs.

**Ricker Model.** We estimate the expected LB-KLD utility with  $3 \times 10^4$  model simulations. In the prior partition step, we set  $n_{min} = 50$  and  $L = 5$ . For the D-posterior precision method, 100 out of  $10^4$  prior-predictive samples are used to compute the posterior statistics.

**Aphid Model.** The implementation setup of the LB-KLD and the D-posterior methods is the same as that of the Ricker model. It should also be mentioned here that, for  $k = 1$  and  $k = 2$ , the optimal solutions are obtained by exhausting all the integer grid points, while the Simultaneous Perturbation Stochastic Approximation algorithm [2] is used to optimize the expected utility functions for  $k = 3$  and  $k = 4$ .

**References**

[1] Thomas M Cover and Joy A Thomas. *Elements of information theory*. John Wiley & Sons, 2012.

[2] James C Spall. An overview of the simultaneous perturbation method for efficient optimization. *Johns Hopkins apl technical digest*, 19(4):482–492, 1998.
